# Supplementary material for: Region-Resolved Quantitative Proteome Profiling Reveals Molecular Dynamics Associated With Chronic Pain in the PNS and Spinal Cord
Source: PubMed Central journal article supplement (PMC6103001; doi:10.3389/fnmol.2018.00259), 2018-08-14
Supplement: Table_12.pdf [file Table_12.pdf]

# Top biological networks harboring differentially regulated proteins in SN

Network List

IPA Build version: 460209M

| Rank | Network                                                                                                                                                                                                                                                                                                                                                                 | Score | Focus/Molecule | Top Diseases and Functions                                                                                     |
|------|-------------------------------------------------------------------------------------------------------------------------------------------------------------------------------------------------------------------------------------------------------------------------------------------------------------------------------------------------------------------------|-------|----------------|----------------------------------------------------------------------------------------------------------------|
| 1    | ANXA1, C1orf123, CORO7/CORO7-PAM16, DDX39B, DDX3X, ENTDP2, FLNA, GAS7, GYG1, H2AF, H2AFY, H2AFZ, HNRNPL, IQGAP1, KHDRBS1, LMNA, MFAP5, MYH9, MYH10, MYO1C, NONO, nucleoside-triphosphatase, OXR1, PLEKHB1, PPP1CA, RDM1, RUVBL1, S100A4, SEC13, SIK, SFPO, SORD, SRSF1, TGM2, TWIF1                                                                                     | 43    | 32             | Cellular Movement, Cellular Assembly and Organization, RNA Post-Transcriptional Modification                   |
| 2    | Abi1/2, Achr, ADS, ASPN, CADM1, CADPS2, CRIP1, CTNNB1, CYP51A1, DAG1, DAM, DRP2, IGATM, Lamin, LAP3, LMBN1, LMBN2, MAP4, MPP6, NDRG2, PRKAR1A, PRKCSH, PRX, RBM39, RCN1, SCARB2, SerineProtease, SGCD, SNTA1, SNTB1, STARD10, SYNM, THOP1, TMPO, UOCRB                                                                                                                  | 41    | 31             | Organ Morphology, Skeletal and Muscular System Development and Function, Cell Morphology                       |
| 3    | 60S ribosomal subunit, CHAT, ENO2, MAP3K, MIRLE17, Ras, RPL3, RPL5, RPL7, RPL9, RPL11, RPL12, RPL14, RPL15, RPL17, RPL18, RPL19, RPL21, RPL22, RPL24, RPL26, RPL27, RPL28, RPL30, RPL31, RPL10A, RPL13A, RPL18A, RPL27A, RPL35A, RPL37A, RPL7A, RPLP2, RTCA, transglutaminase                                                                                           | 38    | 30             | Cancer, Cell Death and Survival, Organismal Injury and Abnormalities                                           |
| 4    | AARS, CAND1, EEF1A1, EEF1B2, EEF1D, EEF1G, EPRS, GPX7, hnRNP H, HNRNPH1, HNRNPUL2, IKK (complex), KHSRP, LARS, MYO5A, Pglycoprotein, PDCD5, RARS, RNASE4, RNase A, RPS9, RPS14, RPS16, RPS25, RTN1, SDCBP, SUMO2, TARDBP, TOM1L2, TOP2B, UBA2, UBE2N, UBE2V1, Ubiquitin, VARS                                                                                           | 38    | 30             | Cellular Assembly and Organization, Molecular Transport, Nucleic Acid Metabolism                               |
| 5    | 6-phosphofructokinase, AAMDC, ASL, ATIC, BZW2, Cytoplasmic Dynein, DMXL2, DYNC1H1, DYNC1L1, DYNLRB1, DYNLT3, EGFR, EPB41, Flotillin, FN3KRP, ITPA, IMATN2, IMATR3, NCDN, NTPCR, PAICS, PFAS, PFK, PFKL, PFKM, PFKP, phosphofructokinase, RAB18, RAB22A, RAB3GAP1, SLC25A32, SLC4A1, tubulin (family), UROD, VPS25                                                       | 36    | 29             | Carbohydrate Metabolism, Small Molecule Biochemistry, Developmental Disorder                                   |
| 6    | 7S NFG, ANXA11, AP-3, AP3B1, ATXN2L, Beta Tubulin, CAV2, CDC42EP4, CELF2, CORO1B, CRMP, CRMP1, DPYSL2, DPYSL3, EML1, EPS15L1, HEBP2, INA, Jnk, LRSAM1, MICAL1, NEFH, NEFL, Nefm, PDCD6, PRKCD, PRPH, PTRF, SDPR, SEC31A, SEPHS1, SEPT9, TEAD, TUBB3, TUBB2B                                                                                                             | 36    | 29             | Cellular Assembly and Organization, Cellular Function and Maintenance, Nervous System Development and Function |
| 7    | Ampa Receptor, Anp32b, COX5A, COX6A1, COX6B1, GNA11, GOLPH3, Gq, HDLBP, HEXA, HIST1H2BO, HIST2H2BF, Hnrnpa1, Hnrnpa3, HNRNPAB, HNRNPD, HP1BP3, IPO4, mGluR, Plc beta, PLCB1, PTBP1, SAFB, SF1, SRC (family), SRSF2, SRSF6, SRSF7, SYNCRIP, THRAP3, TRAP/Media, U2AF2, VPS35, VPS26A, WASHC5                                                                             | 36    | 29             | RNA Post-Transcriptional Modification, Molecular Transport, RNA Trafficking                                    |
| 8    | ABAT, ADAM10, ADAM22, ADAM23, ATP2B2, BASP1, BCAM, CACNA2D1, CALB2, Calmodulin, CD9, CD44, CD81, CNDP2, Collagen type IV, DCLK1, FAM98B, HIST1H2BB, ISLR, ITGA6, ITGB4, Ili, ITH4, ITH5, LAMA5, Laminin, Laminin1, LGI3, LMAN2, Metalloprotease, MYO1B, MYO1D, PLG, SGLP1, TSPAN15                                                                                      | 36    | 29             | Cell-To-Cell Signaling and Interaction, Tissue Development, Cell Morphology                                    |
| 9    | calpain, CAPN2, Cathepsin, CTCSB, CTCS, CTSD, CTSH, DDX15, EEF2, EFTUD2, EIF1, EIF4A3, ENAC, ETF1, GLRX3, GSPT1, HBA1/HBA2, HLA-DR, HNRNPC, HYOU1, LSM2, LSM4, p85 (pik3r), PABPC1, PCBP1, PRPF19, snRNP, SNRNP, SNRNP2, SNRNP3, SNRNP, TPP1, UUG2, UUP1                                                                                                                | 36    | 29             | RNA Post-Transcriptional Modification, Cell Cycle, DNA Replication, Recombination, and Repair                  |
| 10   | ALDOC, APEX1, ATG3, ATP1A1, CA3, Calcineurin B, Cbp/p300, CBR1, DBI, DHX9, DUSP15, EGLN, FASN, GABARAPL2, GANAB, HNRNP2A1, IDI1, INPP5F, MDP1, MPI, MTMR2, MTORC1, NIPSNAP1, p70S6k, PGM1, phosphatase, PPP3CA, RPN1, SCCPDH, SET, SF3A1, SORBS3, SYN11, TCEA1, TN3                                                                                                     | 36    | 29             | Carbohydrate Metabolism, Lipid Metabolism, Small Molecule Biochemistry                                         |
| 11   | 14-3-3, alcohol dehydrogenase, Alpha tubulin, ARL2, CAP2B, CNP, DAD1, Dynein, EML2, Gamma tubulin, HPR1, MAP1B, MAPK3, TMTHFD1L, PAFAH1B1, PEX14, PFN1, RBM3, SEC61A1, SEC61B, SIRT2, somatostatin receptor, SSRI, SYNE2, TCP1, TPPP, TUBA8, TUBBA4, TUBB, TUBB1, TUBB6, TUBB2A, TUBB4A, TUBB4B, tubulin                                                                | 34    | 28             | Cancer, Hematological Disease, Immunological Disease                                                           |
| 12   | AEBP1, CNTRF, Cops2, COPS3, COPS4, Cytochrome bc1, cytochrome-c oxidase, DOST, dolichyl-diphosphooligosaccharide-protein glycotransferase E3 RING, ESYT1, ETFA, GPC1, GSP1, HIST1H2BN, ITMC2, Ktn1, MAOA, Mapk, Mitochondrial complex 1, NADH dehydrogenase, NDUFA12, NDUFB1, NDUFB8, NDUFS1, OSBP1LA, Plc delta, RPN2, SKP1, STOML2, STT3A, TME2D2, TME43, VAPB, YIF1B | 32    | 27             | Post-Translational Modification, Developmental Disorder, Hereditary Disorder                                   |
| 13   | BANF1, CAMK2G, CBX3, CBX5, CFB, DDX5, DDX17, DEK, EMD, FBL, Fus, HDGF, HIST2H2AC, histone acetylase, Histone h4, HNRNPM, HP1, HPX, ILF3, MAGOH, NuRD, PLS3, RBBP4, RCC2, RPL10, SAMHD1, STAT1, SUB1, TFIIF, TH2 Cytokine, thymidine kinase, Top2, TRIM28, UBE4A, UFD1L                                                                                                  | 32    | 27             | RNA Post-Transcriptional Modification, Cancer, Gastrointestinal Disease                                        |
| 14   | ANO6, ATXN10, BSG, CDK5, DPP8, EIF3E, ELAVL1, FAM114A2, GIT1, GLOD4, HIBADH, Histone h3, HNRNPU, HSPB1, Interferon alpha, ISOC1, KRAS, LRP1, LTA4H, MCTS1, NEDD4L, NFkB (family), Notch, PIGN, Pro-inflammatory Cytokine, RNA polymerase II, RPL13, SERPIN1A1, SF3B1, TBCB, TCR, Tir, UBL3, VTN, ZC2HC1                                                                 | 32    | 27             | Neurological Disease, Skeletal and Muscular Disorders, Endocrine System Disorders                              |
| 15   | ACO2, Aconitase, Alfacatenin, ANK1, ANK3, Ap2alpha, ATP1A2, ATP1A3, ATP1B1, ATP1B3, AURK, CADM4, CORO1C, EPB41L2, EPB41L3, FLOT2, FSTL1, IGFBP6, ITPR, KIF5C, Mapre, Mapre2, MAPRE3, MYEF2, MYO18A, Na-k-ATPase, NEXN, P38 MAPK, PIP4K2A, SORBS2, Spectrin, SPTA1, SPTAN1, SPTB, SPTBN1                                                                                 | 30    | 26             | Cellular Function and Maintenance, Small Molecule Biochemistry, Molecular Transport                            |
| 16   | Alyref, Angiotensin II receptor type 1, APOO, ARCN1, Arf, C19orf70, CALR, COL15A1, COL1A2, COL4A2, COL6A1, Collagen Alpha1, COP1, COPA, COPB1, DBNL, EFEMP1, ENDOD1, Focal adhesion kinase, GORASP2, KIF21A, KRT73, Lpar receptor, MHC Class I (complex), PDGF (family), PDI3A, PDI4A, PURB, SARS, SEC23B, SERPINH1, Tap, THBS4, TMED10, USO1                           | 30    | 26             | Cancer, Connective Tissue Disorders, Organismal Injury and Abnormalities                                       |
| 17   | AAK1, AHS1, AVIL, BAG3, Beta Arrestin, CHORDC1, Clathrin, DNAJB4, DNAJC6, DNAJC7, ECHDC1, FKBP4, Gpcr, Hdac, HSP, Hsp70, Hsp90, Hsp22/Hsp40/Hsp90, HSP90A1, HSP90B1, HSPA8, HSPA9, HSPA12A, HSPA4L, HSPB8, HSPH1, LIMCH1, MHC Class II (complex), NACA, NAP1L1, PPP5C, SAE1, ST13, STIP1, SUGT1                                                                         | 30    | 26             | Post-Translational Modification, Protein Folding, Drug Metabolism                                              |
| 18   | 19S proteasome, 20S proteasome, adenosylhomocysteinase, ADRM1, AHCY, AHY1, AHY2, ATPase, CAPG, CROCC, Cytokeratin, Foxo, KIAA0368, MCAM, OLA1, OSTF1, PI3K (complex), PSMA, PSMC, PSMC2, PSMC3, PSMC5, PSMC6, PSMD, PSMD3, PSMD5, PSMD6, PSMD7, PSMD9, PSMD11, PSMD13, PSME2, UBE2O, UBLQNL1, USP14                                                                     | 28    | 25             | Cancer, Cell Death and Survival, Organismal Injury and Abnormalities                                           |
| 19   | amylase, Anp32a, AP1B1, AP2A1, Betaadaplin, C4BP, CADPS, Collagen type ix, Collagen type V, CPLX1, ESD, FARSB, FN1, GABA-Areceptor, H2AFV, HIST1H2BK, KRT81, MIR200, MTAP, Mug1/Mug2, NAPB, NAPG, NSF, phosphorylase, PYGB, PYGM, Rab5, RAB3A, SLC5A3, SNAP25, Snare, STXB1, SYN2, TPD52L2, YKT6                                                                        | 28    | 25             | Cellular Assembly and Organization, Cellular Function and Maintenance, Molecular Transport                     |
| 20   | Caveolin, CD2AP, C3, DLST, DNM1, DNM2, DNM3, Dynammin, EHD1, EHD2, EHD3, EHD4, Endophilin, ERK1/2, GLIPR2, growth factor receptor, JAM3, LRRCS9, MICAL3, MYO1E, NCO2, PACSIN1, PACSIN2, PACSIN3, PKC alpha/beta, Pki, PRPSAP1, PRPSAP2, SH3GL2, SH3GL2B, SUMO, Syntaxin, Vta-4                                                                                          | 27    | 24             | Cellular Function and Maintenance, Cellular Assembly and Organization, Nervous System Development and Function |
| 21   | AACS, ACSL1, ACSL4, adenosine-tetraphosphatase, APOA4, APOD, ATP synthase, ATP5H, ATP5J, ATP5O, C10BP, C21orf33/LOC102724023, CP, DLAT, EPHX1, ERH, F1 ATPase, FABP3, Ferritin, IDH1, Insulin, MIR124, N-corr, NCOX-LXR-Oxysterol-RXR-9 cis RA, Nr1h, Orm1 (includes others), PDHB, Pdi, PGD, PGK1, PHYHIP, SCAMP2, Sreb, STRAP, VSNL1                                  | 27    | 24             | Lipid Metabolism, Small Molecule Biochemistry, Molecular Transport                                             |
| 22   | AKR1B1, ANXA5, BCAT1, Caspase 3/7, CBWD1, CLIP2, CSNK1A1, CYP2J2, EIF2S1, Feer1, FGF1, GCLC, GCLM, Gm-csf, GPC6, HNRNPK, Ikb, LDL, MAP2K2, MAP2K4, MAP2K12, Mek, MRC1, MVP, NCL, PI3K (family), PREP, PRKCD, Proinsulin, RPL23, RPS3, RPS6, Rsk, Shc, TTC9                                                                                                              | 27    | 24             | Protein Synthesis, Cardiovascular Disease, Organismal Injury and Abnormalities                                 |
| 23   | aldehyde dehydrogenase, aldehyde dehydrogenase (NAD), ALDH, ALDH2, ALDH1A1, ALDH1L1, ALDH6A1, ALDH7A1, ALDH9A1, AP15, C3-Cfb, CFH, CLIC1, ERK, ETFB, JFH, glutathiontransferase, GOT, GOT1, GOT2, Gsta4, GSTM3, INPP1, IQGAP2, malate dehydrogenase, MDH1, MDM2, PC, PCP4, PITPNA, PLXNB1, RhoGap, S100, TMSB4                                                          | 25    | 23             | Small Molecule Biochemistry, Cellular Function and Maintenance, Energy Production                              |
| 24   | ABLIM2, ACTR2, ACTR3, Alpha1 antitrypsin, Alpha actin, Arp2/3, ARPC2, ARPC3, ARPC4, ARPC1B, ARPC1B, ARPC1B, COTL1, Ctnna, CTNNA2, CTNNA3, DBN1, F2, F Actin, G-Actin, GST, Myosin2, NCKIPSD, NWASP, PDLIM1, PGM2L1, phosphoinositide phospholipase C, PLCB3, PLCD1, Pmca, Profilin, RHN1, SERPING1, SRM, TAGLN2, TAGLN3                                                 | 25    | 23             | Cellular Assembly and Organization, Cellular Function and Maintenance, Tissue Development                      |
| 25   | ABC6, ACADS, APOA1, APOE, C3, CALCB, chemokine, Crip2, DPEP1, EC1, FAM129A, FTL, GPX4, HDL, HDL-cholesterol, hemoglobin, HTP, IL-2R, IL2 (complex), LGMN, IMAP7D1, mediator, IMVK, Nos, PHGDH, PRDX1, PRDX5, RIDA, SAA, SKIV2L2, STEAP3, T3-TR-RXR, Tnf receptor, TXN, VLDL                                                                                             | 25    | 23             | Free Radical Scavenging, Small Molecule Biochemistry, Connective Tissue Development and Function               |
